# Supplementary material
Source: HighWire-hosted journal article supplement (https://cmaj.ca/highwire/filestream/76571/field_highwire_adjunct_files/2/191297-res-3-at.pdf)
Supplement: 191297-res-3-at.pdf [file 191297-res-3-at.pdf]

**Appendix 3 (as supplied by the authors):** Estimation of patient-level healthcare costs

Costs for **inpatient, outpatient, and emergency department (ED) encounters** were calculated by multiplying the appropriate resource intensity weight for each record in the DAD or NACRS by CIHI's Cost of a Standard Hospital Stay.

**Physician services** were costed using the 'fee paid' field attached to each fee-for-service physician services record, but the 'fee approved' field (equivalent to what would have been paid if billed under fee-for-service) was used for shadow billed claims associated with capitated physician services.

Costs were summed across settings to obtain estimates of total cost by patient.
